# Supplementary material for: Impact of IgG1 N-glycosylation on their interaction with Fc gamma receptors
Source: PubMed Central journal article supplement — Curr Res Immunol. 2020 Jun 27;1:23–37. doi: 10.1016/j.crimmu.2020.06.001 (PMC9040152; doi:10.1016/j.crimmu.2020.06.001), 2020-06-27
Supplement: mmc1.pdf [file mmc1.pdf]

## **Supplementary data**

### **Impact of IgG1 N-glycosylation on their interaction with Fc gamma receptors**

Florian Cambay<sup>1,2</sup>, Céline Raymond<sup>5</sup>, Denis Brochu<sup>4</sup>, Michel Gilbert<sup>4</sup>, The Minh Tu<sup>2</sup>, Christiane Cantin<sup>2</sup>, Anne Lenferink<sup>2</sup>, Maxime Grail<sup>1</sup>, Olivier Henry<sup>1</sup>, Gregory De Crescenzo<sup>1</sup> and Yves Durocher<sup>2,3\*</sup>

<sup>1</sup>Department of Chemical Engineering, Polytechnique Montréal; Montreal, Canada

<sup>2</sup>Human Health Therapeutics Research Center, National Research Council of Canada; Montreal, Canada

<sup>3</sup>Department of Biochemistry and Molecular Medicine; University of Montreal; Montreal, Canada

<sup>4</sup>Human Health Therapeutics Research Center, National Research Council of Canada; Ottawa, Canada

<sup>5</sup>Merck Biodevelopment, Martillac, France

\*Corresponding author: [Yves.Durocher@cnrc-nrc.gc.ca](mailto:Yves.Durocher@cnrc-nrc.gc.ca) ; Human Health Therapeutics Research Centre, National Research Council Canada, 6100 Royalmount, Montreal, QC, H4P 2R2, Canada.

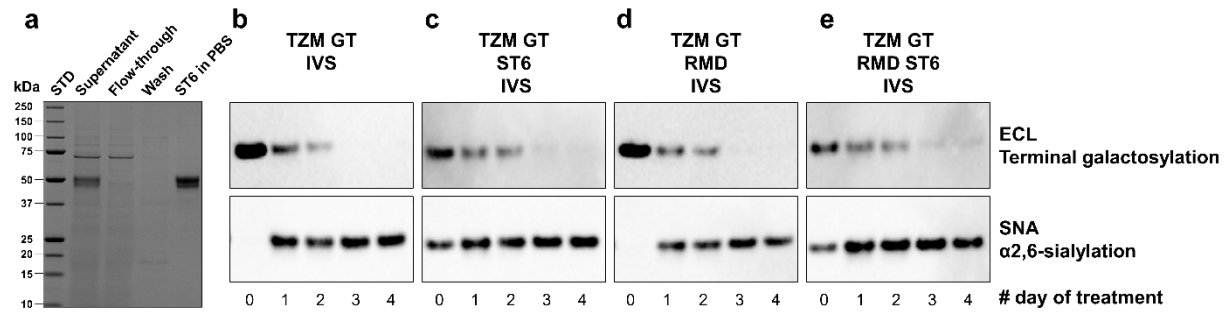

**Figure S1: Soluble ST6Gal1 purification and characterization.** (a) SDS-PAGE analysis (non-reducing conditions) of soluble ST6Gal1 production and purification (Coomassie Blue staining). (b-e) *In vitro* sialylation (IVS) of TzM GT, TzM GTST6, TzM GTRMD and TzM GTRMDST6 was performed with the purified soluble human ST6Gal1. To assess terminal galactosylation and  $\alpha$ 2,6-sialylation levels during the *in vitro* sialylation process, ECL and SNA blots were performed under reducing conditions, respectively. Only the bands corresponding to the heavy chains of the antibodies are shown.

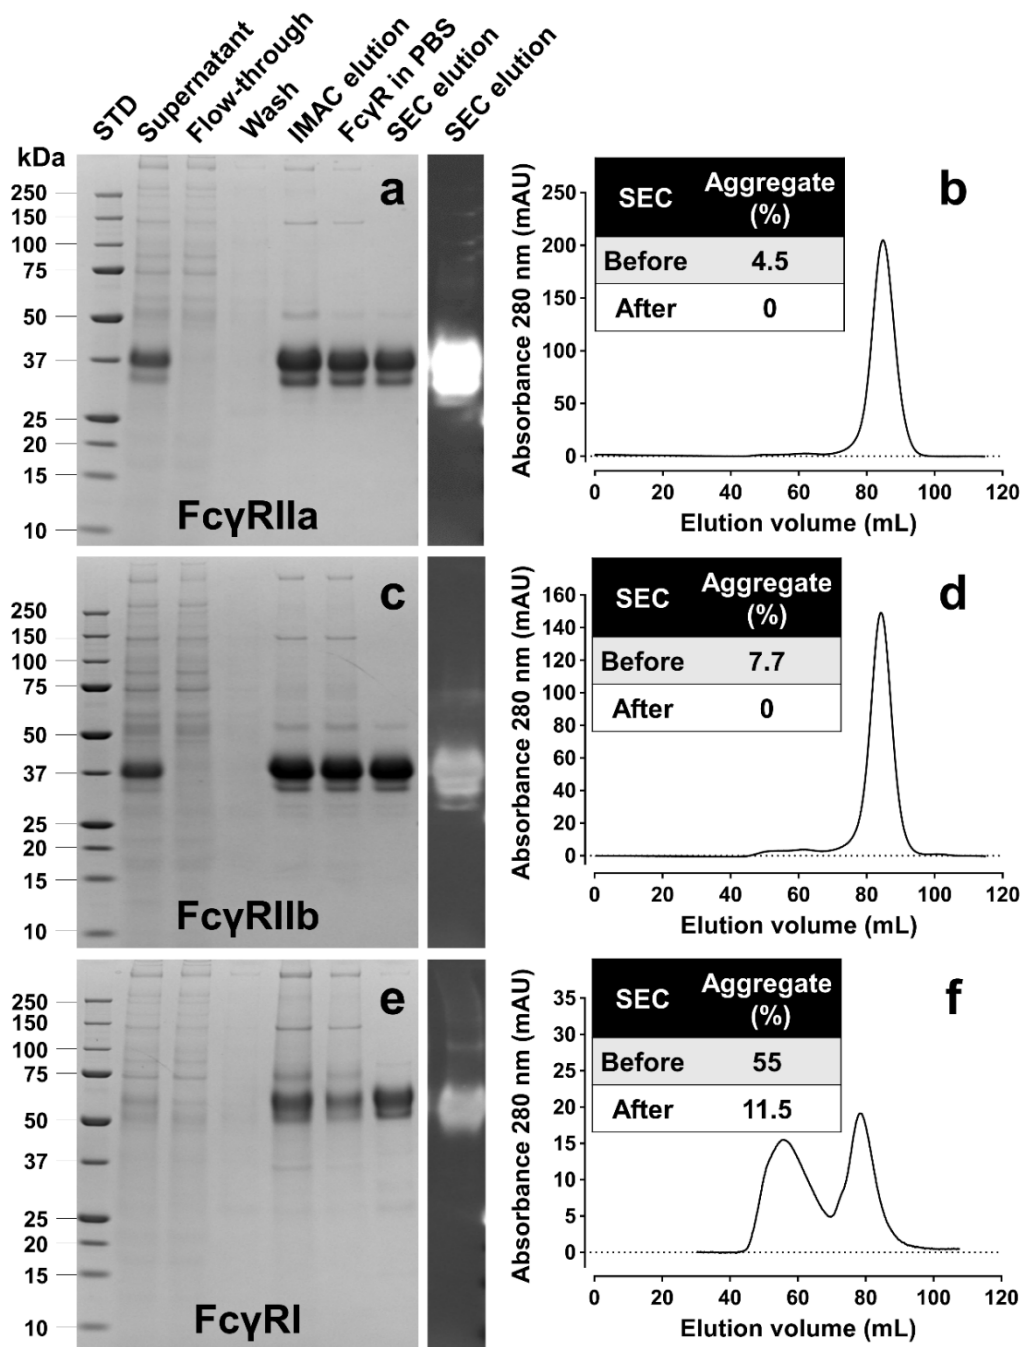

**Figure S2: E5-tagged Fc $\gamma$ Rs production and purification.** SDS-PAGE analysis (non-reducing conditions) of E5-tagged Fc $\gamma$ RIIa (a), E5-tagged Fc $\gamma$ RIIb (c) and E5-tagged Fc $\gamma$ RI (e) production and purification (Coomassie Blue staining or transfer to nitrocellulose membrane and probing with Penta-His<sup>TM</sup> Alexa Fluor<sup>®</sup> 488 Conjugate). Chromatograms corresponding to the SEC of E5-tagged Fc $\gamma$ RIIa (b), E5-tagged Fc $\gamma$ RIIb (d) and E5-tagged Fc $\gamma$ RI (f) using a HiLoad 16/600 Superdex 200 Prep grade. Fractions were pooled then aggregate contents were assessed by analytical SEC (see insets).

**Table S1: Apparent  $K_D$  values measured by our surface plasmon resonance assay.**

|                        | FcγRIIIa <sub>F158</sub> * |    |            |    | FcγRIIIa <sub>V158</sub> * |    |            |    | FcγRIIa*   |    |            |    | FcγRIIb*   |    |             |    | FcγRI**     |    |             |    |
|------------------------|----------------------------|----|------------|----|----------------------------|----|------------|----|------------|----|------------|----|------------|----|-------------|----|-------------|----|-------------|----|
|                        | CHO                        |    | HEK293     |    | CHO                        |    | HEK293     |    | CHO        |    | HEK293     |    | CHO        |    | HEK293      |    | CHO         |    |             |    |
|                        | $K_D$ (nM)                 | SD | $K_D$ (nM) | SD | $K_D$ (nM)                 | SD | $K_D$ (nM) | SD | $K_D$ (nM) | SD | $K_D$ (nM) | SD | $K_D$ (nM) | SD | $K_D$ (nM)  | SD | $K_D1$ (nM) | SD | $K_D2$ (nM) | SD |
| <b>TZM</b>             | 3852 ± 116                 |    | 3285 ± 198 |    | 879 ± 85                   |    | 852 ± 144  |    | 1916 ± 257 |    | 1988 ± 322 |    | 4670 ± 407 |    | 5245 ± 315  |    | 0.19 ± 0.03 |    | 1.84 ± 0.24 |    |
| <b>TZM GT</b>          | 1878 ± 368                 |    | 1608 ± 395 |    | 408 ± 74                   |    | 373 ± 71   |    | 1573 ± 153 |    | 1639 ± 225 |    | 3971 ± 544 |    | 3671 ± 1630 |    | 0.13 ± 0.01 |    | 1.32 ± 0.11 |    |
| <b>TZM GTST6</b>       | 1747 ± 43                  |    | 1466 ± 44  |    | 396 ± 44                   |    | 358 ± 45   |    | 1545 ± 209 |    | 1508 ± 166 |    | 3651 ± 605 |    | 3947 ± 631  |    | 0.11 ± 0.01 |    | 1.15 ± 0.15 |    |
| <b>TZM GTIVS</b>       | 2055 ± 215                 |    | 1664 ± 194 |    | 473 ± 62                   |    | 422 ± 51   |    | 1816 ± 214 |    | 1794 ± 153 |    | 4174 ± 933 |    | 3853 ± 1733 |    | 0.14 ± 0.03 |    | 1.26 ± 0.07 |    |
| <b>TZM GTST6IVS</b>    | 2255 ± 37                  |    | 1916 ± 19  |    | 473 ± 21                   |    | 414 ± 14   |    | 1860 ± 161 |    | 1811 ± 91  |    | 4224 ± 854 |    | 3758 ± 1782 |    | 0.13 ± 0.01 |    | 1.15 ± 0.16 |    |
| <b>TZM RMD</b>         | 120 ± 17                   |    | 100 ± 15   |    | 32 ± 6                     |    | 27 ± 4     |    | 1952 ± 403 |    | 1915 ± 374 |    | 3435 ± 573 |    | 3741 ± 455  |    | 0.15 ± 0.04 |    | 1.42 ± 0.23 |    |
| <b>TZM GTRMD</b>       | 89 ± 8                     |    | 76 ± 3     |    | 23 ± 4                     |    | 19 ± 3     |    | 1610 ± 205 |    | 1598 ± 191 |    | 3097 ± 512 |    | 2774 ± 1289 |    | 0.14 ± 0.05 |    | 1.29 ± 0.31 |    |
| <b>TZM GTRMDST6</b>    | 85 ± 3                     |    | 66 ± 6     |    | 22 ± 3                     |    | 19 ± 2     |    | 1523 ± 163 |    | 1516 ± 103 |    | 2982 ± 302 |    | 2982 ± 648  |    | 0.14 ± 0.06 |    | 1.35 ± 0.41 |    |
| <b>TZM GTRMDIVS</b>    | 107 ± 14                   |    | 85 ± 13    |    | 32 ± 6                     |    | 26 ± 4     |    | 1835 ± 264 |    | 1811 ± 217 |    | 3378 ± 752 |    | 2975 ± 1621 |    | 0.14 ± 0.05 |    | 1.26 ± 0.49 |    |
| <b>TZM GTRMDST6IVS</b> | 110 ± 13                   |    | 87 ± 11    |    | 28 ± 1                     |    | 22 ± 1     |    | 1857 ± 119 |    | 1833 ± 65  |    | 3405 ± 628 |    | 2898 ± 1616 |    | 0.14 ± 0.03 |    | 1.26 ± 0.31 |    |

The  $K_D$  values provided here should be used to compare antibodies with one another but not as absolute values.

SD- Standard deviation

\*-  $K_D$  values were obtained by steady-state affinity with a one-to-one binding model.

\*\* -  $K_D$  values were obtained by globally fitting the data with a kinetic model that assumes that monomeric and aggregated FcγRI bind to TZM glycoforms with distinct kinetics.

**Table S2: EC<sub>50</sub> of the TzM glycoforms.**

|                    | EC <sub>50</sub> (ng/mL) |                          |
|--------------------|--------------------------|--------------------------|
|                    | FcyRIIIa <sub>F158</sub> | FcyRIIIa <sub>V158</sub> |
| Synagis            | n.d.                     | n.d.                     |
| Herceptin          | 24.29                    | 16.11                    |
| TzM ng             | n.d.                     | n.d.                     |
| TzM                | 71.04                    | 36.34                    |
| TzM GT             | 46.31                    | 25.02                    |
| TzM GT ST6         | 35.01                    | 20.21                    |
| TzM GT IVS         | n.d.                     | 22.67                    |
| TzM GT ST6 IVS     | 57.24                    | 26.65                    |
| TzM RMD            | 22.22                    | 9.215                    |
| TzM GT RMD         | 15.51                    | 6.79                     |
| TzM GT RMD ST6     | 14.71                    | 7.251                    |
| TzM GT RMD IVS     | 20.90                    | 8.944                    |
| TzM GT RMD ST6 IVS | 17.24                    | 7.977                    |

n.d.- not determined
